# Supplementary material
Source: publisher figshare collection journal article supplement (https://future-science-group.figshare.com/ndownloader/files/33970418)
Supplement: Supplementary file 1 [file 33970418]

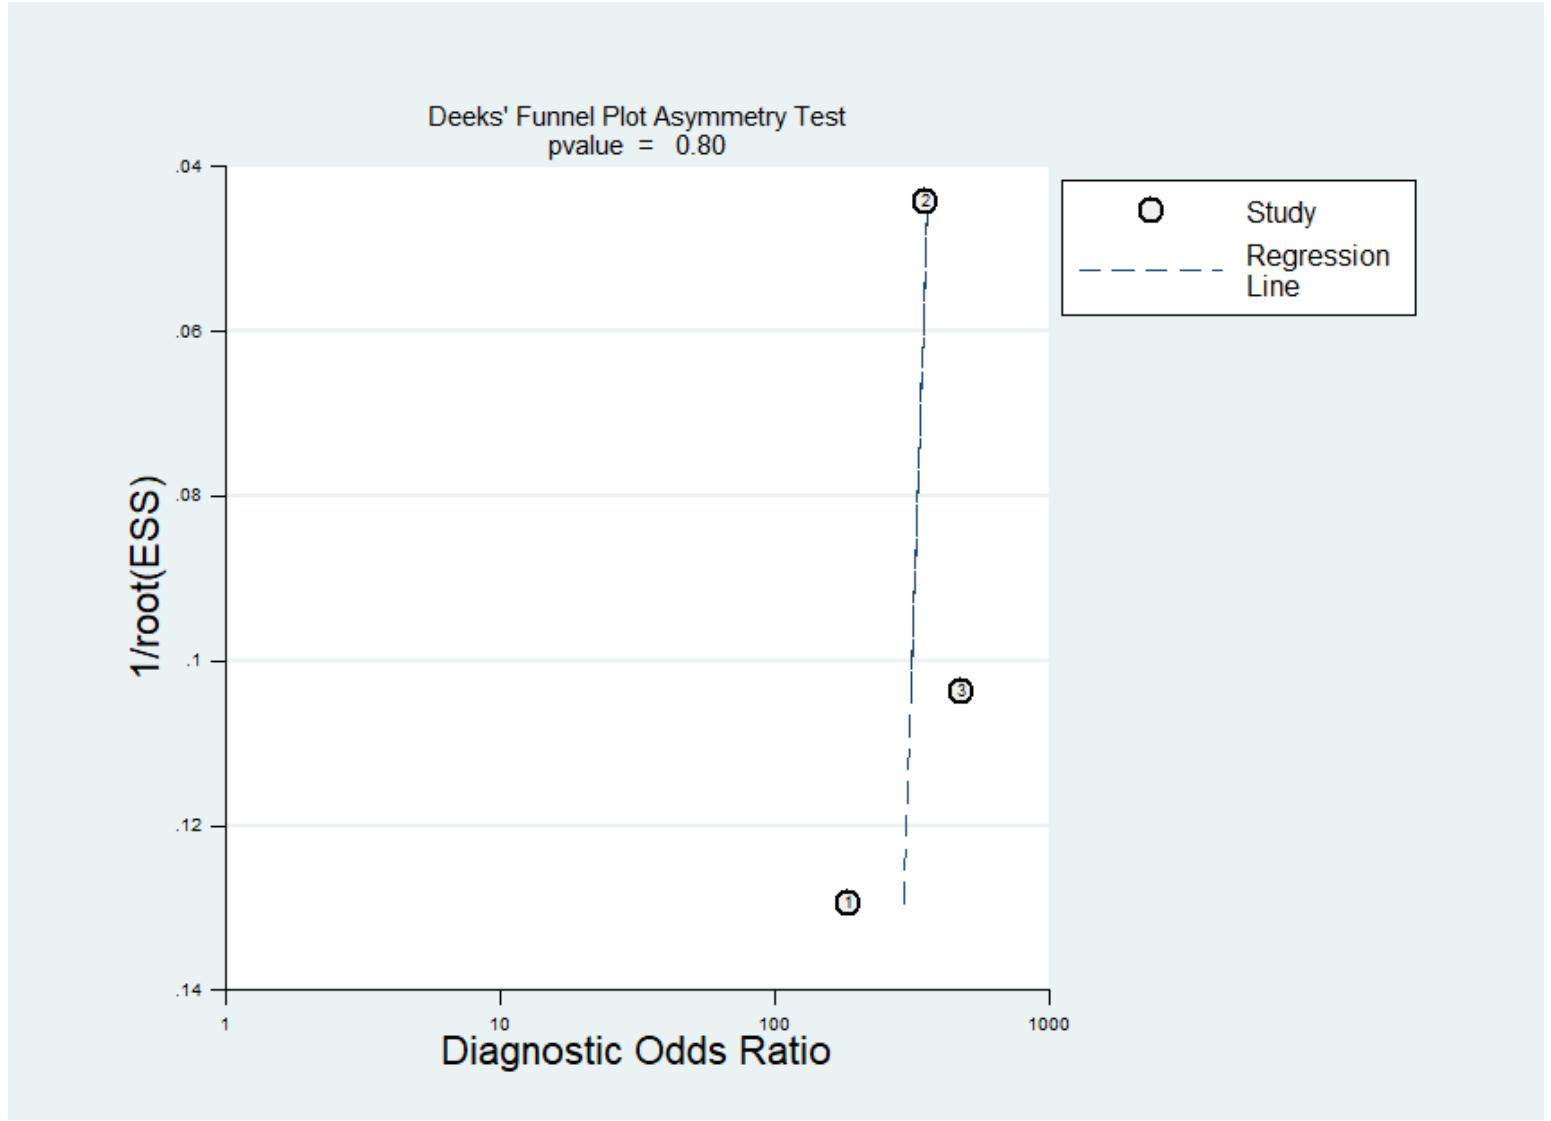

Supplementary figure II: Deek's funnel plot for segment-based analysis. Deek's funnel plot asymmetry test illustrating no publication bias detected for segment-based analysis.

ESS: effective sample size.
